# Supplementary material for: Hydrophobin Fusion of an Influenza Virus Hemagglutinin Allows High Transient Expression in Nicotiana benthamiana, Easy Purification and Immune Response with Neutralizing Activity
Source: PubMed Central journal article supplement (PMC4277400; doi:10.1371/journal.pone.0115944), 2014-12-26
Supplement: pone.0115944.s002.pdf [file pone.0115944.s002.pdf]

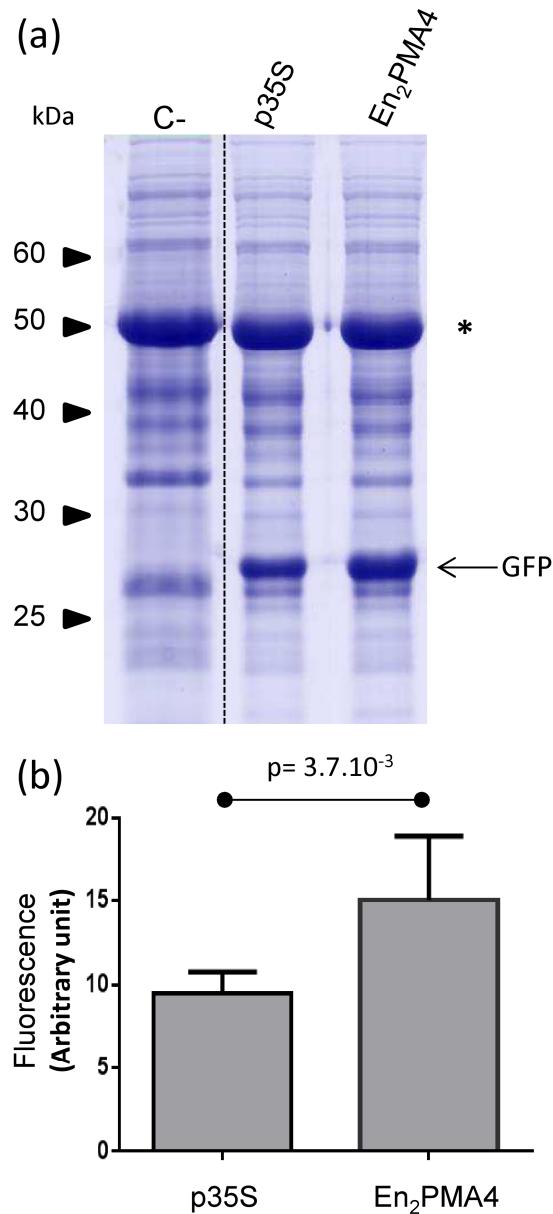

**Figure S2. Transient GFP expression comparison in *N. benthamiana* leaves between two strong transcriptional promoters.**

Leaves were infiltrated with an *A. tumefaciens* strain containing the pEAQ-HT vector with the *GFP* gene driven by the p35S or En<sub>2</sub>PMA4 promoter. A leaf transformed with an empty pEAQ-HT vector was used as a negative control. A TSP fraction was prepared at 6 dpi. (a) Twenty  $\mu\text{g}$  of TSP were analyzed by SDS-PAGE and the gel was stained with colloidal blue. The large Rubisco subunit is indicated (\*), and the GFP is indicated by an arrow. (b) The GFP content of six independent samples (50  $\mu\text{g}$  TSP) for each promoter was quantified by fluorimetry (excitation at 395 nm and emission at 508 nm).
