# Supplementary material for: Hydrophobin Fusion of an Influenza Virus Hemagglutinin Allows High Transient Expression in Nicotiana benthamiana, Easy Purification and Immune Response with Neutralizing Activity
Source: PubMed Central journal article supplement (PMC4277400; doi:10.1371/journal.pone.0115944), 2014-12-26
Supplement: pone.0115944.s005.pdf [file pone.0115944.s005.pdf]

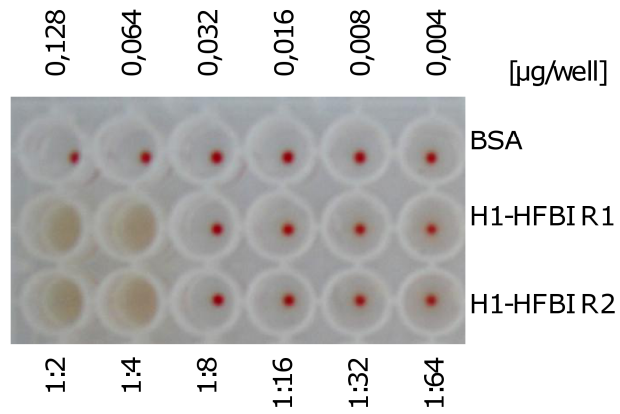

**Figure S5: Hemagglutination assay of purified HA-HFBI.**

Hemagglutination assay was performed as indicated in the Experimental procedures using serial two-fold diluted samples of dissolved ammonium sulfate precipitate of H1-HFBI (duplicate R1, R2). The upper row contains BSA as a negative control.
