# Supplementary material for: Hydrophobin Fusion of an Influenza Virus Hemagglutinin Allows High Transient Expression in Nicotiana benthamiana, Easy Purification and Immune Response with Neutralizing Activity
Source: PubMed Central journal article supplement (PMC4277400; doi:10.1371/journal.pone.0115944), 2014-12-26
Supplement: pone.0115944.s007.pdf [file pone.0115944.s007.pdf]

**Table S1. Identification of the proteins contaminating the ATPS-purified sample<sup>1</sup>.**

| Band <sup>2</sup> | Accession number | Protein name                                                      | Size (kDa) |
|-------------------|------------------|-------------------------------------------------------------------|------------|
| 1                 | gi 384038819     | chloroplast PsbO4 precursor                                       | 35.4       |
| 2                 | gi 61697113      | chloroplast photosynthetic oxygen-evolving protein 23 kDa subunit | 28.3       |
| 3                 | gi 511774224     | 2-Cys peroxiredoxin                                               | 25.5       |
| 4                 | gi 58700507      | chloroplast oxygen-evolving protein 16 kDa subunit                | 24.2       |
| 5                 | gi 343174748     | pathogenesis-related protein 1                                    | 17.7       |

<sup>1</sup>Method: The acquired spectra were analyzed using the Applied Biosystems GPS Explorer (version 3.6) and the Matrix Science MASCOT algorithm in the NCBI *N. benthamiana* database and the NCBI *N. benthamiana* EST database, as described in DUBY et al. (2010).

Reverse phase separation of peptides was completed on an Ultimate 3000 chromatography chain (ThermoFisher Scientific) using a C18 PepMap 100 analytical column (150 mm, 3 µm i.d., 100 Å), (ThermoFisher Scientific). Previously the sample was dissolved in 0.025% (v/v) TFA and 5% (v/v) ACN and desalted using a C18 Pep Map 100 pre-column (10 mm, 5 µm i.d., 100 Å). Peptides were backflushed onto the analytical column with a flow rate of 300 nL/min by a 180 min linear gradient from 8 to 76% (v/v) ACN in water containing 0.1% (v/v) TFA in buffer A and 0.085% (v/v) TFA in buffer B.

The eluted peptides were mixed with α-cyano-4-hydrocinnamic acid (4 mg/mL in 70% ACN/0.1% TFA) and spotted directly onto a MALDI target using a Probot system (ThermoFisher Scientific).

<sup>2</sup>The band numbers correspond to those annotated in Figure 5.
